# Supplementary figures and images for: On the road to cost-effective fossil fuel desulfurization byGordonia alkanivoransstrain 1B
Source: Royal Society of Chemistry journal article supplement (doi:10.1039/c9ra03601f), 2019-01-01

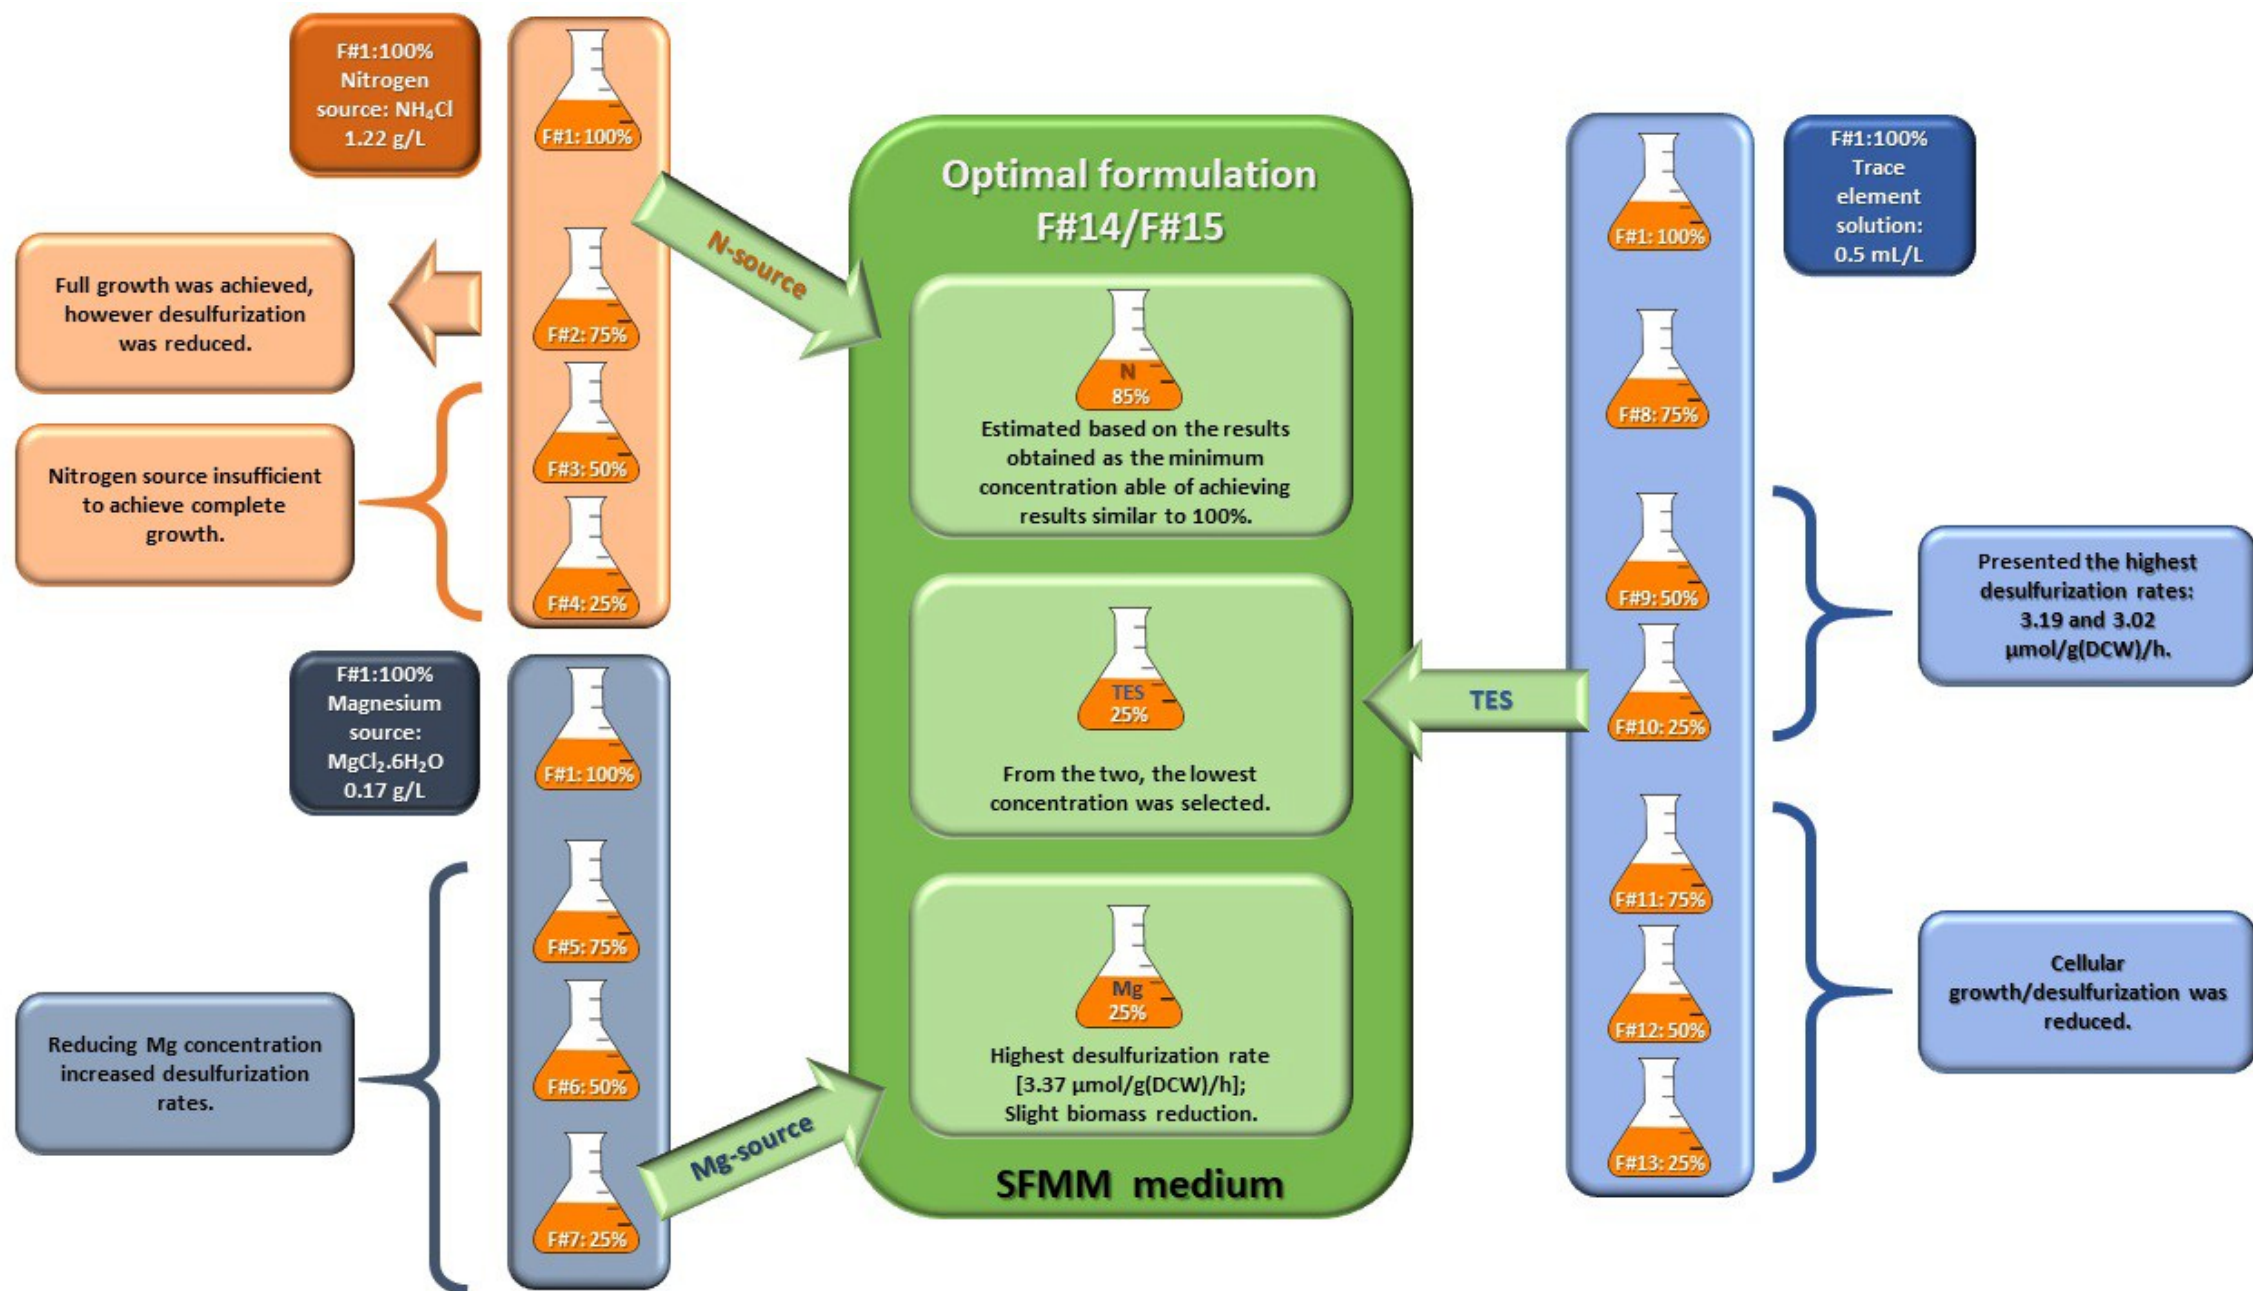

Supplement: c9ra03601f2.pdf [file c9ra03601f2.pdf]
